# Supplementary material
Source: publisher site journal article supplement (https://www.dovepress.com/article/217905)
Supplement: Supplementary file 1 [file get_supplementary_file.php]

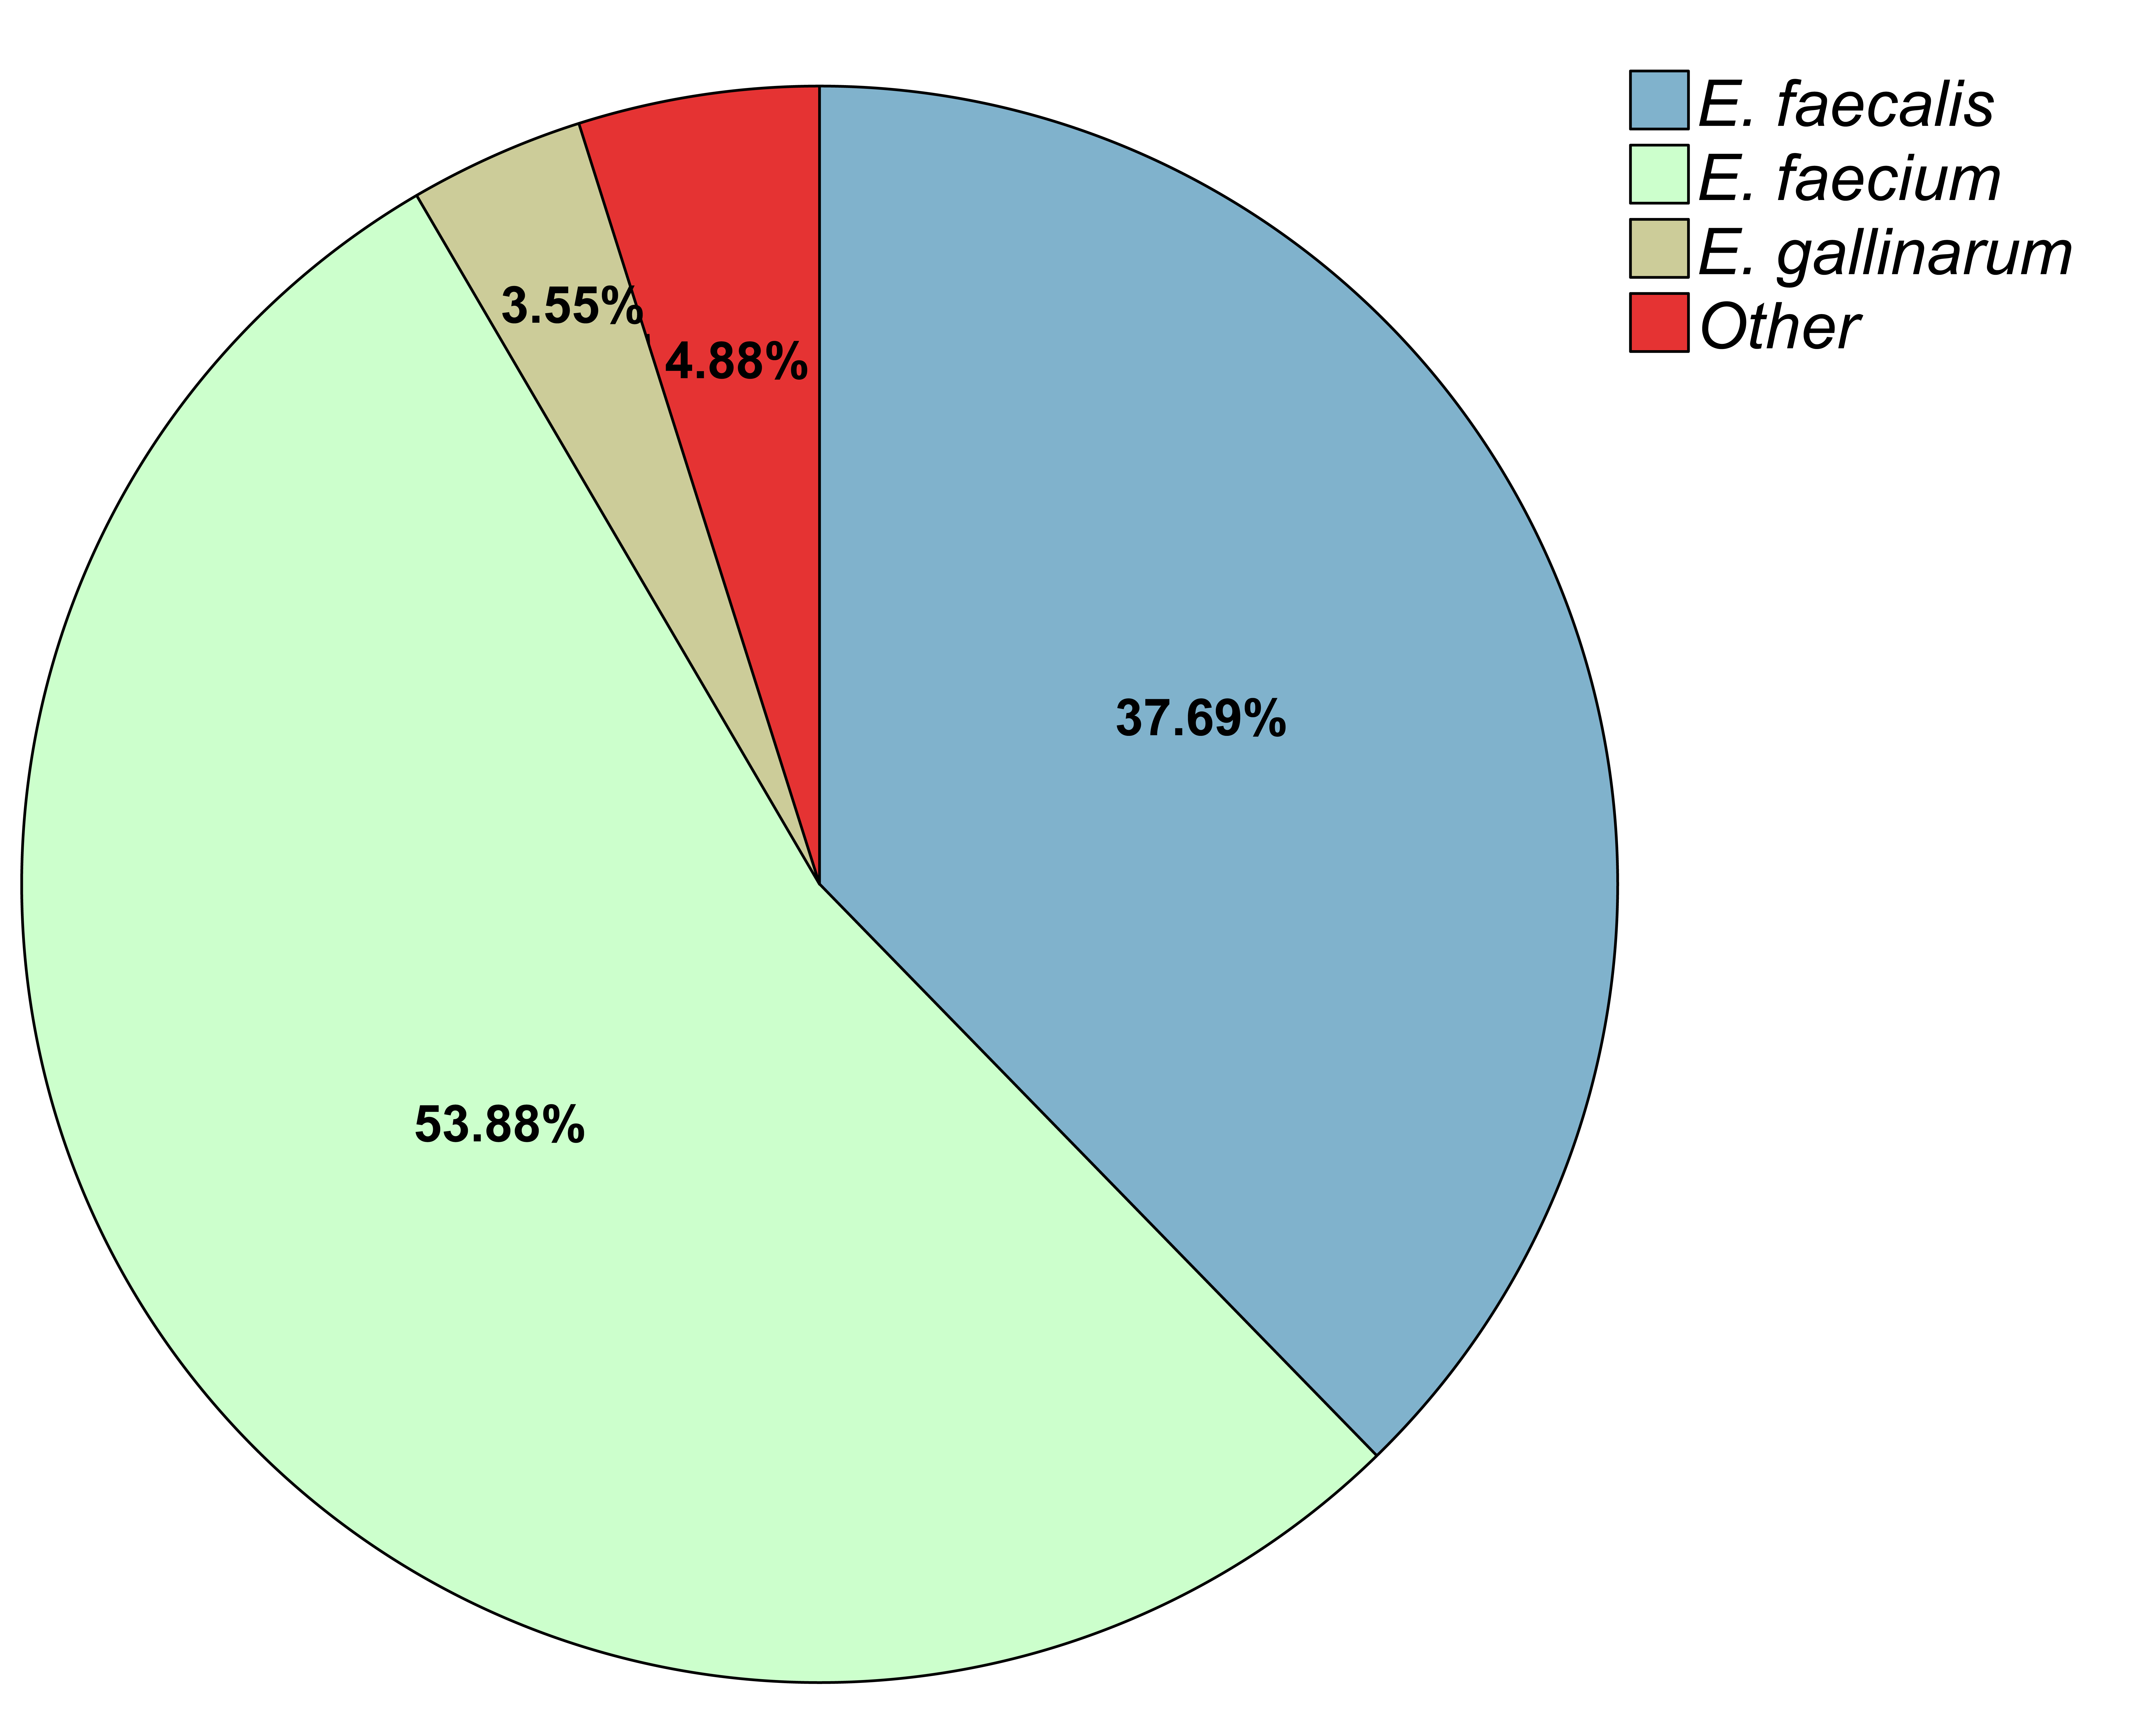


**Supplementary Figure 1:** Distribution of enterococcus in bloodstream infections.

**Notes:** Others, *Enterococcus avium* 2%; *Enterococcus casseliflavus* 1.8%; *Enterococcus raffinosus* 0.9%; *Enterococcus hirae* 0.2%*.*

**Abbreviations:** *E. faecium*, *Enterococcus faecium*; *E. faecalis*, *Enterococcus faecalis*; *E*. *gallinarum; Enterococcus gallinarum.*


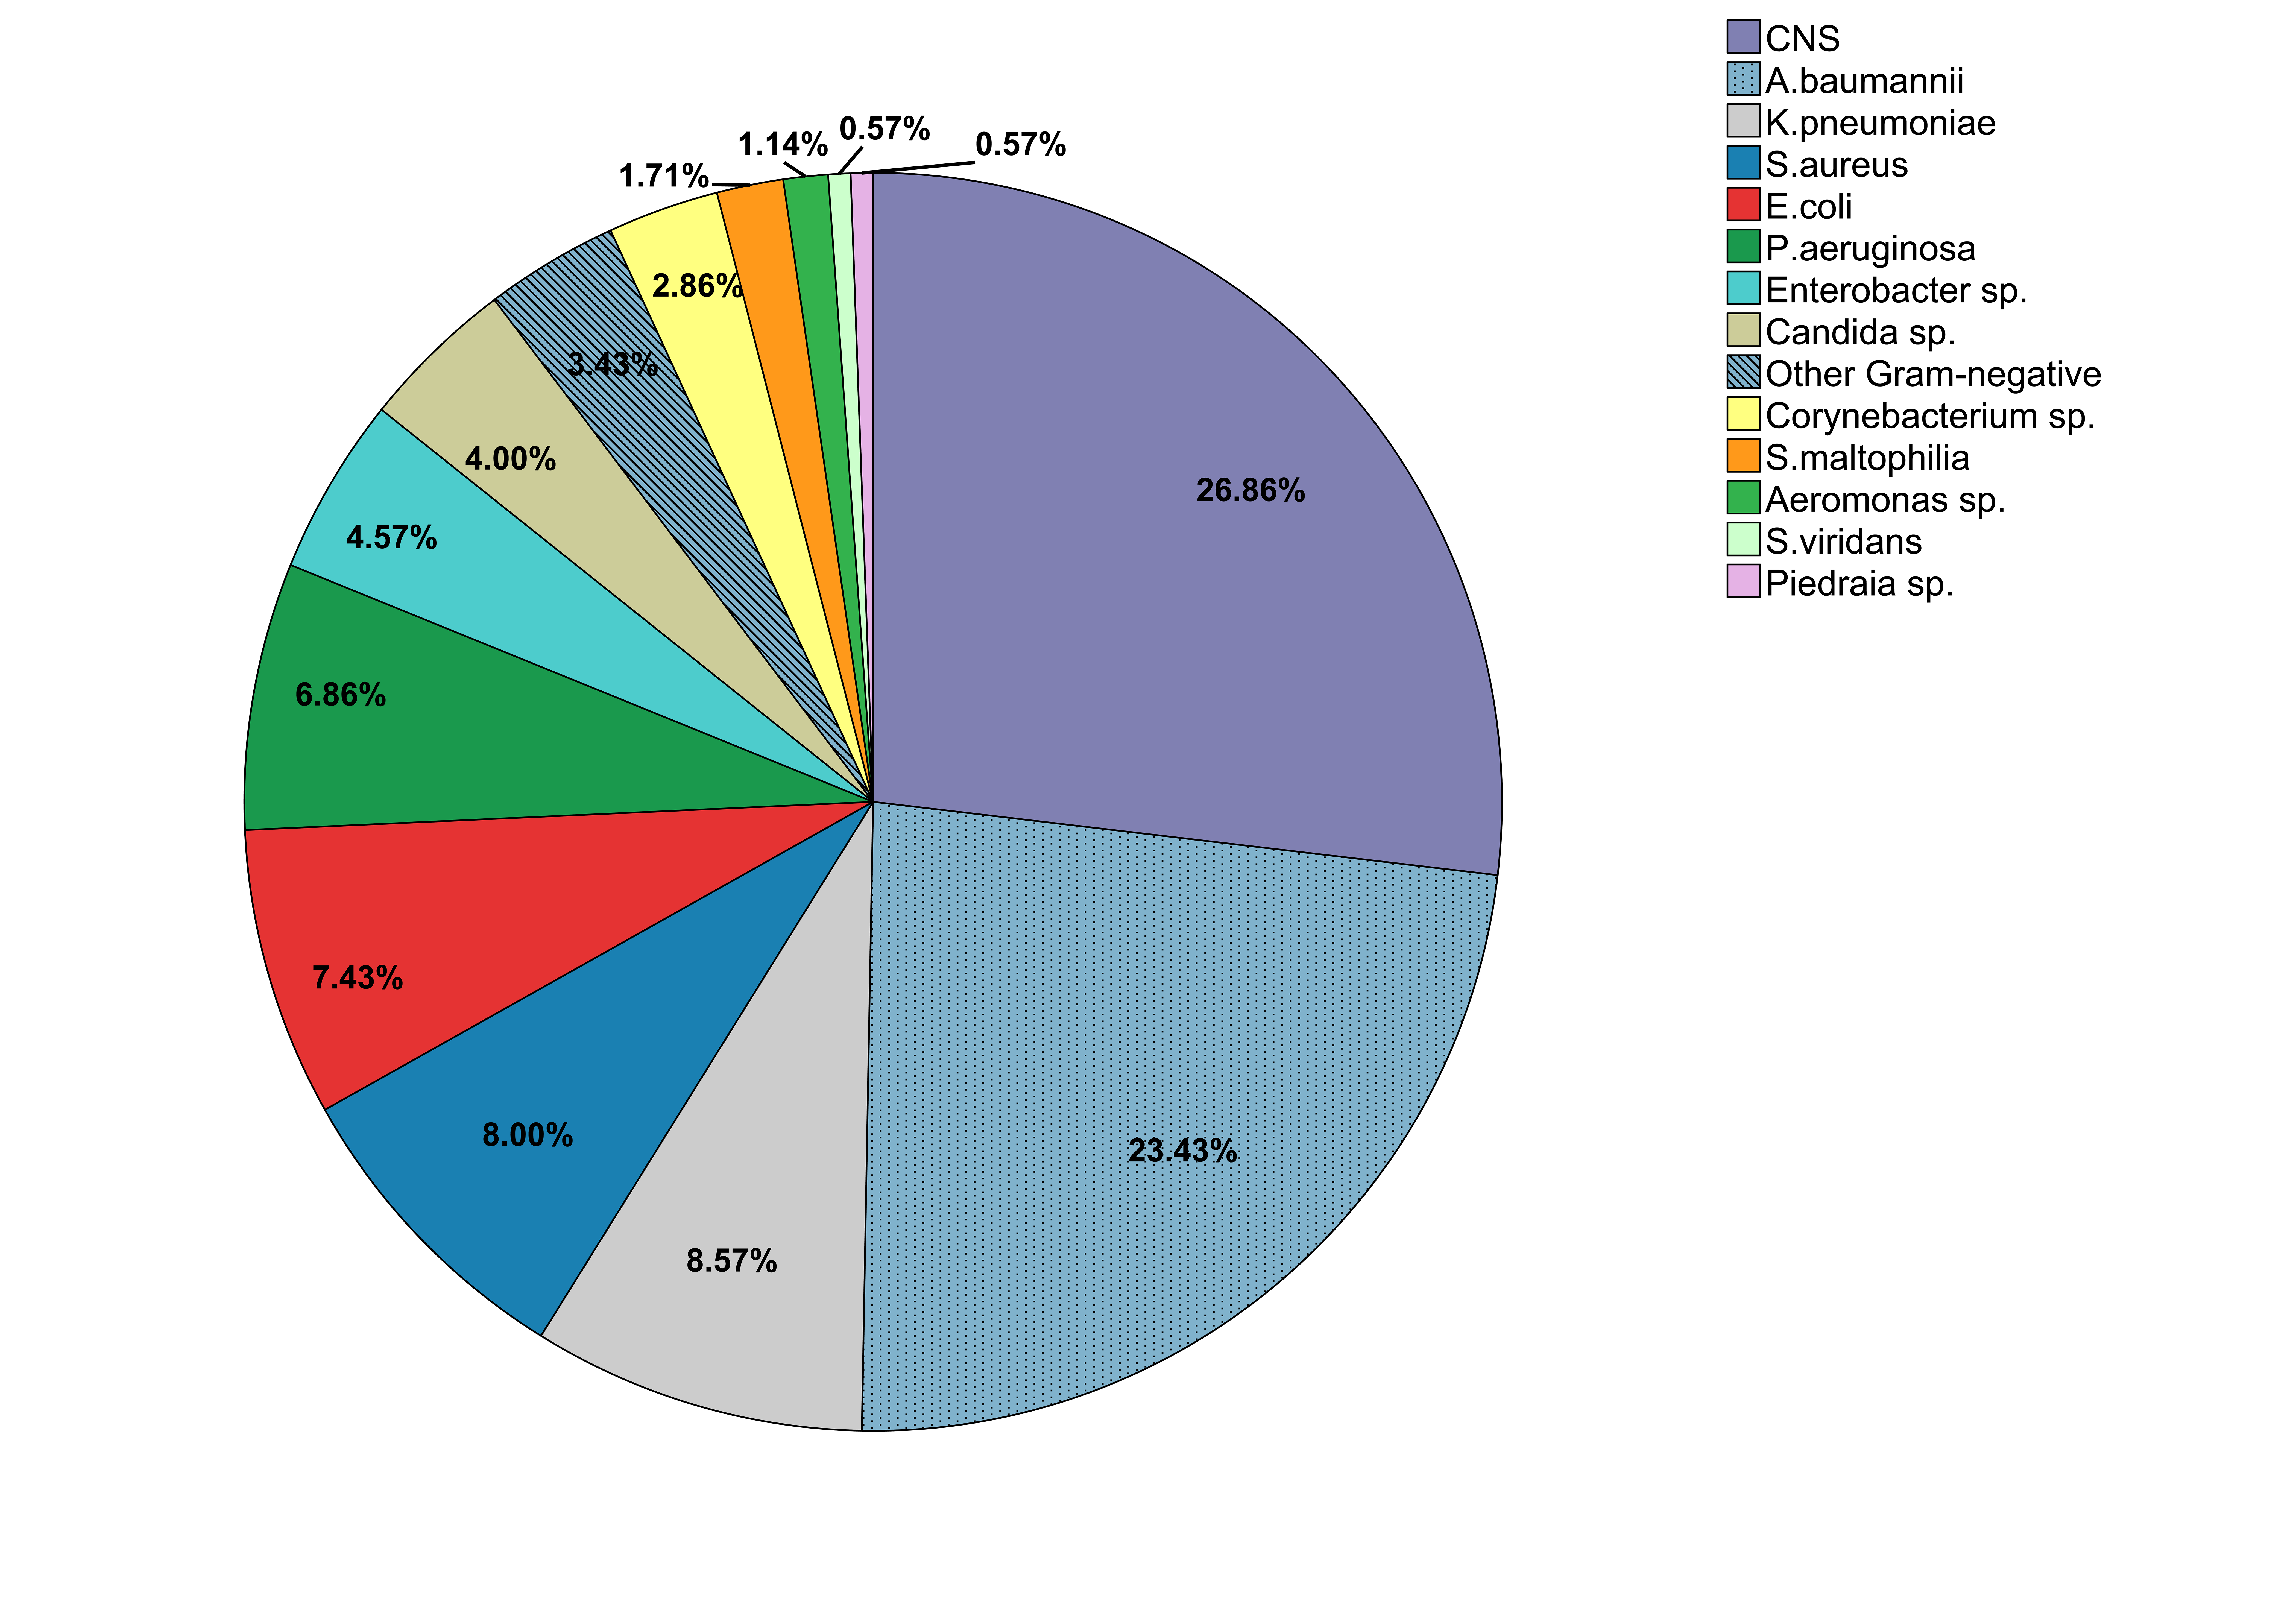


**Supplemental Figure 2**: Distribution of the additional organisms in mixed-enterococcal bloodstream infections.

**Abbreviations:** CNS, *Coagulase-negative Staphylococcus; A. baumannii, Acinetobacter baumannii*; *K. pneumoniae, Klebsiella pneumoniae*; *S. aureus*, *Staphylococcus aureus*; *E. coli*, *Escherichia coli*; *P. aeruginosa*, *Pseudomonas aeruginosa*; *S. maltophilia*, *Stenotrophomonas maltophilia*; *S. viridans*, *Streptococcus viridans.*

**

**

**Supplemental Figure 3:** Comparison of serum procalcitonin between groups of mono-EBSI, mixed-EBSI with Gram-negative bacteria and mixed-EBSI with non-Gram-negative bacteria.

**Notes:** **P<0.001.

**Abbreviations:** EBSI, enterococcal bloodstream infections; PCT, procalcitonin; NS, not significant.
